# Supplementary material for: Somatosensory Deficits After Stroke: Insights From MRI Studies
Source: PubMed Central journal article supplement (PMC9328992; doi:10.3389/fneur.2022.891283), 2022-07-12
Supplement: Table_1.pdf [file Table_1.pdf]

Table S1 longitudinal changes in structural and functional features in stroke patients with somatosensory deficits

| Reference                 | Subjects  | Time point             |         |          | Main findings                                                                                                                                   |                                                                                                                                                 |                                                                                                                                                                                                                     |
|---------------------------|-----------|------------------------|---------|----------|-------------------------------------------------------------------------------------------------------------------------------------------------|-------------------------------------------------------------------------------------------------------------------------------------------------|---------------------------------------------------------------------------------------------------------------------------------------------------------------------------------------------------------------------|
|                           |           | 1-stage                | 2-stage | 3-stage  | 1-stage                                                                                                                                         | 2-stage                                                                                                                                         | 3-stage                                                                                                                                                                                                             |
| Bannister et al., 2015(1) | 10SP/10HC | 1-month                | 6-month | /        | Greater improvement of TDT scores was associated with greater FC between contralesional SI and contralesional cerebellum and hippocampus        | Greater improvement of TDT scores was associated with greater FC between contralesional SII and IPC and contralesional thalamus and cerebellum. | /                                                                                                                                                                                                                   |
| kessner et al,2019(2)     | 10IIS     | within 5 days of onset | 3-month | 12-month | Significant associations between lower RASP scores and lesioned brain tissue were found in the S1, S2, IC and frontoparietal subcortical areas. | Only the S1 and S2 showed significant involvement with lower RASP scores.                                                                       | no statistical significance was found between lesion sites and RASP scores.                                                                                                                                         |
| Yassi et al,2015(3)       | 15IS/7HC  | within 7 days of onset | 1-month | 3-month  | The mean volume of the contralesional thalamus was lower than HC but not statistically significant.                                             | Contralesional thalamic volume was significant reduced compared to baseline.                                                                    | The degree of atrophy was significant reduced compared to baseline and correlated with initial stroke severity; a significant linear reduction in FC between the contralesional thalamus and the rest of the brain. |

Abbreviation: FC, functional connectivity; HC, health control; HOFC, high-order functional connectivity; HS, hemorrhagic stroke; IS, ischemic stroke; MRI, magnetic resonance imaging; RASP, Rivermead Assessment of Somatosensory Performance; SP, stroke patients; TDT, Tactile Discrimination Test.

1. Bannister LC, Crewther SG, Gavrilesco M, Carey LM. Improvement in Touch Sensation after Stroke is Associated with Resting Functional Connectivity Changes. *Front Neurol* (2015) 6:165. doi: 10.3389/fneur.2015.00165
2. Kessner SS, Schlemm E, Cheng B, Bingel U, Fiehler J, Gerloff C, Thomalla G. Somatosensory Deficits After Ischemic Stroke Time Course and Association With Infarct Location. *Stroke* (2019) 50:1116–1123. doi: 10.1161/strokeaha.118.023750
3. Yassi N, Malpas CB, Campbell BCV, Moffat B, Steward C, Parsons MW, Desmond PM, Donnan GA, Davis SM, Bivard A. Contralesional Thalamic Surface Atrophy and Functional Disconnection 3 Months after Ischemic Stroke. *Cerebrovasc Dis* (2015) 39:232–241. doi: 10.1159/000381105
